# Supplementary material
Source: publisher figshare collection journal article supplement (https://acs.figshare.com/ndownloader/files/3856882)
Supplement: Supplementary file 1 [file 3856882]

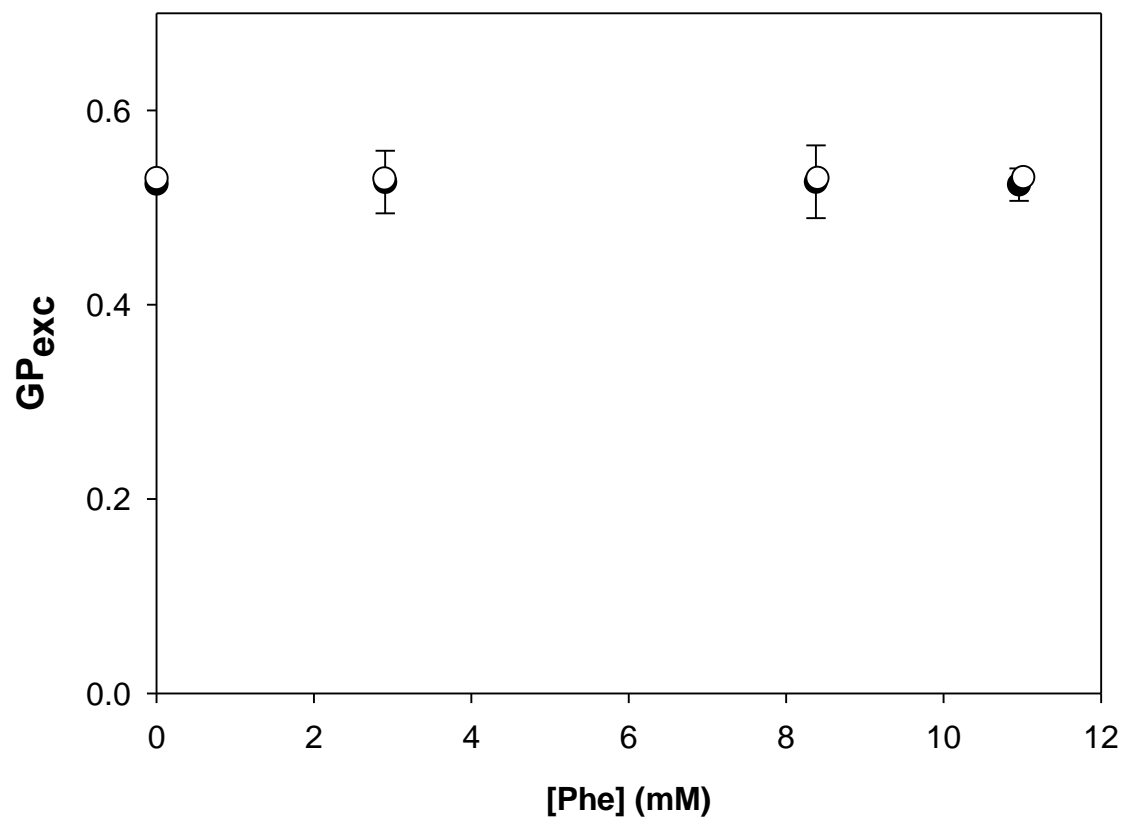

**Effect on  $\Delta G_p$  exc of Laurdan of Phe concentration:**

(○)  $G_p$  exc in the presence of PEG 14 mM

(●)  $G_p$  exc in the absence of PEG 14 mM
